# Supplementary material for: High-dimensional mass cytometry identifies T cell and B cell signatures predicting reduced risk of Plasmodium vivax malaria
Source: PubMed Central journal article supplement (PMC8410020; doi:10.1172/jci.insight.148086), 2021-07-22
Supplement: jciinsight-6-148086-s130.pdf [file jciinsight-6-148086-s130.pdf]

# Supplemental Material

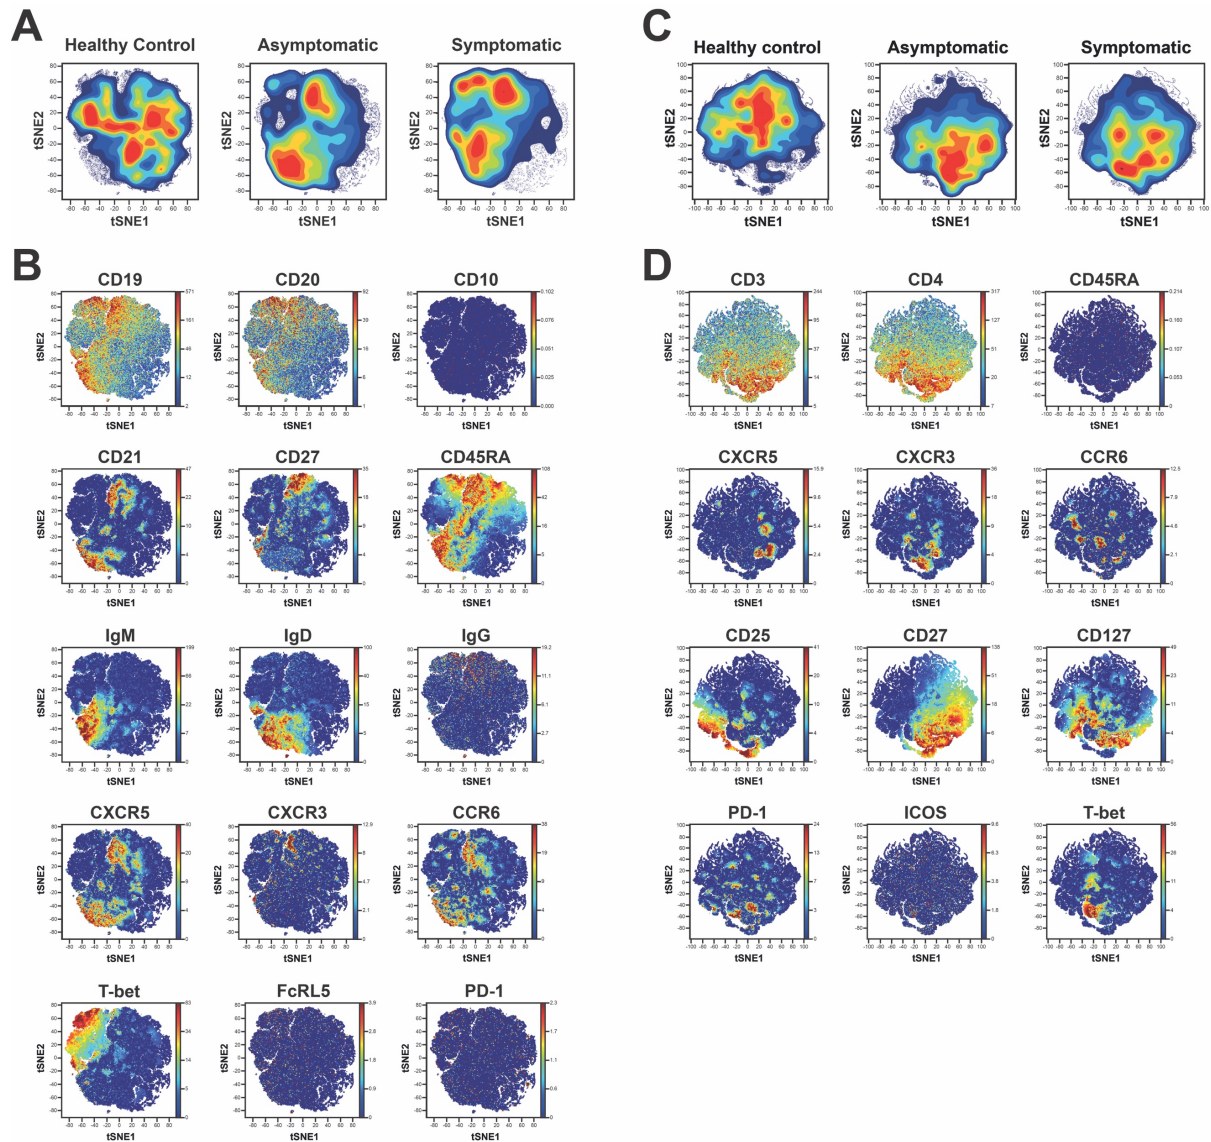

**Supplemental Figure 1: Visualization of marker expression among the entire MBC and memory CD4<sup>+</sup> T cell compartments.** PBMCs from *P. vivax* symptomatic (n=11) and asymptomatic (n=19) infected individuals as well as healthy immune controls (n=24) were stained with a panel of metal-labelled antibodies and analysed by CyTOF. tSNE analysis was performed on the entire MBC (A) and memory CD4<sup>+</sup> T cell compartments (C). tSNE plots display cell density and represent the pooled data for each group. Each marker used for the characterization of MBCs and memory CD4<sup>+</sup> T cells was then overlaid on tSNE plots (B and D).

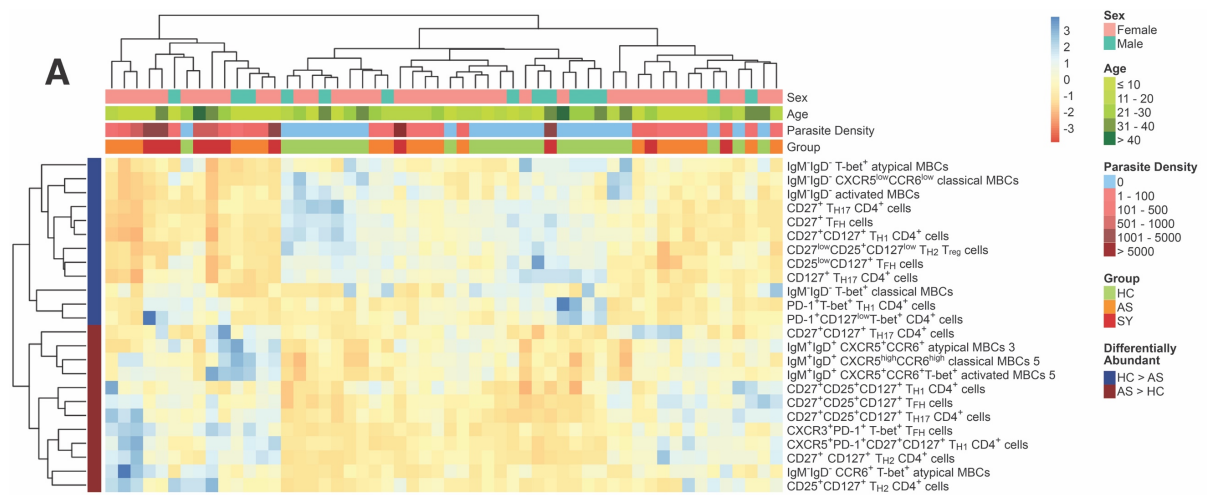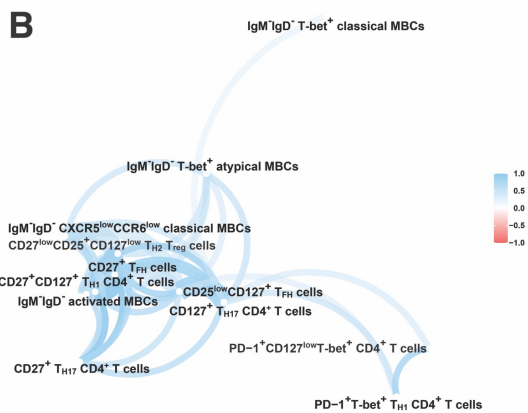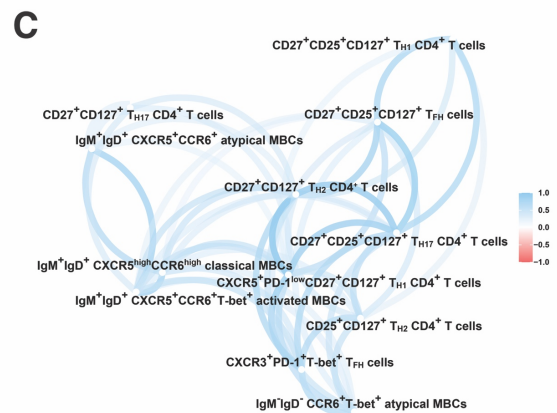

**Supplemental Figure 2: Correlations between cell populations that are differentially abundant between healthy controls and asymptomatic individuals.** PBMCs from *P. vivax* symptomatic (n=11) and asymptomatic (n=19) infected individuals as well as healthy immune controls (n=24) were stained with a panel of metal-labelled antibodies and analysed by CyTOF. Unsupervised hierarchical clustering heatmap showing the frequency of differentially abundant cell populations between healthy controls and asymptomatic individuals (A). Spearman correlation networks were used to determine the relationship between cell populations that were either reduced (B) or increased (C) in healthy controls compared to individuals with an asymptomatic infection.

**Supplemental Table 1: Surface marker antibodies for CyTOF**

| <b>Antibody</b>              | <b>Clone</b> | <b>Supplier</b> |
|------------------------------|--------------|-----------------|
| 141Pr-conjugated anti-CCR6   | 11A9         | Fluidigm        |
| 143Nd-conjugated anti-CD45RA | HI100        | Fluidigm        |
| 146Nd-conjugated anti-IgD    | IA6-2        | Fluidigm        |
| 147Sm-conjugated anti-CD20   | 2H7          | Fluidigm        |
| 151Eu-conjugated anti-ICOS   | DX29         | Fluidigm        |
| 152Sm-conjugated anti-CD21   | BL13         | Fluidigm        |
| 153Eu-conjugated anti-CXCR5  | RF8B2        | Fluidigm        |
| 156Gd-conjugated anti-CXCR3  | G025H7       | Fluidigm        |
| 158Gd-conjugated anti-CD10   | HI10a        | Fluidigm        |
| 165Ho-conjugated anti-CD19   | HIB19        | Fluidigm        |
| 167Er-conjugated anti-CD27   | L128         | Fluidigm        |
| 170Er-conjugated anti-CD3    | UCHT1        | Fluidigm        |
| 172Yb-conjugated anti-IgM    | MHM-88       | Fluidigm        |
| 174Yb-conjugated anti-CD4    | SK3          | Fluidigm        |
| 175Lu-conjugated anti-PD-1   | EH12.2H7     | Fluidigm        |
| 176Yb-conjugated anti-CD127  | A019D5       | Fluidigm        |
| APC-conjugated anti-IgG      | M1310G05     | Biolegend       |
| PE-conjugated anti-FcRL5     | 509f6        | Biolegend       |
| 145Nd-conjugated anti-PE     | PE001        | Fluidigm        |
| 162Dy-conjugated anti-APC    | APC003       | Fluidigm        |

**Supplemental Table 2: Surface marker antibodies for FACS**

| <b>Antibody</b>                   | <b>Clone</b> | <b>Supplier</b> |
|-----------------------------------|--------------|-----------------|
| BB515-conjugated anti-CCR6        | 11A9         | BD              |
| PE-conjugated anti-CCR4           | 1G1          | BD              |
| PE CF594-conjugated anti-CXCR3    | 1C6/CXCR3    | BD              |
| Pacific Blue-conjugated anti-CD25 | M-A251       | Biologend       |
| AF647-conjugated anti-CXCR5       | RF8B2        | BD              |
| AF532-conjugated anti-CD3e        | UCHT1        | Invitrogen      |
| APC-Cy7-conjugated anti-CCR7      | G043H7       | Biologend       |
| BV605-conjugated anti-CD127       | HIL-7R-M21   | BD              |
| BV650-conjugated anti-CD27        | MT2T4        | BD              |
| BV711-conjugated anti-PD-1        | EH12.2H7     | Biologend       |
| BV786-conjugated anti-CD4         | SK3          | BD              |
| PE-Cy5-conjugated anti-CD45RA     | HI100        | BD              |
| FITC-conjugated anti-IgA          | Polyclonal   | SouthernBiotech |
| Pacific Blue-conjugated anti-CCR6 | G034E3       | Biologend       |
| APC-Fire 750-conjugated anti-IgD  | IA6-2        | Biologend       |
| PE-conjugated anti-FcRL5          | 509f6        | Biologend       |
| PE-Cy7-conjugated anti-CD21       | Bu32         | Biologend       |
| APC-conjugated anti-IgG           | M1310G05     | Biologend       |
| AF700-conjugated anti-CD10        | HI10a        | BD              |
| PerCP-Cy5.5-conjugated anti-IgE   | MHE-18       | Biologend       |
| BV605-conjugated anti-IgM         | MHM-88       | Biologend       |
| BV711-conjugated anti-CD19        | HIB19        | Biologend       |
| BV785-conjugated anti-CD20        | 2H7          | Biologend       |
